# Supplementary material for: 3-D scaffold platform for optimized non-viral transfection of multipotent stem cells
Source: Royal Society of Chemistry journal article supplement (doi:10.1039/c4tb00957f), 2014-01-01
Supplement: c4tb00957f1.pdf [file c4tb00957f1.pdf]

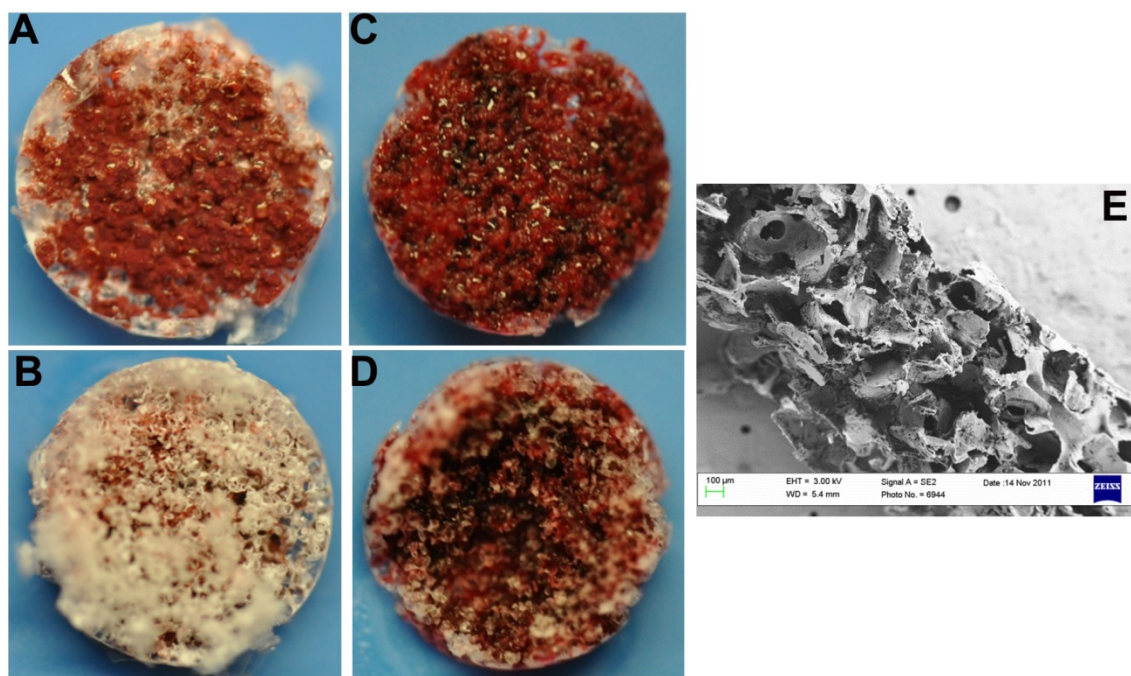

Fig S- 1 Influence of precursor coating on mineral coating uniformity visualized by Alizarin Red staining: A) top of scaffold without 10X mSBF treatment B) bottom of scaffold without 10X mSBF treatment C) top of scaffold with 10X mSBF treatment D) bottom of scaffold with 10X mSBF treatment, and E) SEM micrograph of cross section of a scaffold from 3D scaffold array
